# Supplementary material for: Structure-based virtual screening discovers novel PKMYT1 inhibitors
Source: Royal Society of Chemistry journal article supplement (doi:10.1039/d4md00389f), 2024-01-01
Supplement: d4md00389f1.pdf [file d4md00389f1.pdf]

## Supplementary Material

# Structure-based virtual screening discovers novel PKMYT1 inhibitors

Haoyu Zhang<sup>a,b,c</sup>, Jinyu Yu<sup>a,b,c</sup>, Ziheng Yang<sup>a,b,c</sup>, Zhiqiang Guo<sup>a,b,c</sup>, Rui Liu<sup>a,b,c</sup>, Qiaohua Qin<sup>a,b,c</sup>, Yixiang Sun<sup>a,b,c</sup>, Nian Liu<sup>a,b,c</sup>, Zixuan Gao<sup>a,b,c</sup>, Dongmei, Zhao<sup>a,b,c\*</sup>, Maosheng Cheng<sup>a,b,c</sup>

<sup>a</sup> Key Laboratory of Structure-Based Drug Design & Discovery of Ministry of Education, Shenyang Pharmaceutical University, Shenyang 110016, China

<sup>b</sup> School of Pharmaceutical Engineering, Shenyang Pharmaceutical University, Shenyang 110016, China

<sup>c</sup> Key Laboratory of Intelligent Drug Design and New Drug Discovery of Liaoning Province, Shenyang Pharmaceutical University, Shenyang 110016, China

\*Corresponding author: Prof. Dongmei Zhao, [medchemzhao@163.com](mailto:medchemzhao@163.com).

|                                                                                             |   |
|---------------------------------------------------------------------------------------------|---|
| The final virtual screening results, including docking scores and MMGBSA calculations. .... | 3 |
| Decoy data set for virtual screening model validation .....                                 | 7 |
| The dynamics simulations data of hit compounds and positive control. ....                   | 7 |
| Raw data from compound kinase activity tests .....                                          | 9 |

**The final virtual screening results, including docking scores and MMGBSA calculations.**

**Table S1.** The results of hit compounds via Virtual screening.

| Name                                 | CAS         | docking score | MMGBSA dG Bind (kcal /mol) |
|--------------------------------------|-------------|---------------|----------------------------|
| (-)-Galocatechin gallate             | 4233-96-9   | -10.933       | -81.54                     |
| Secoisolariciresinol diglucoside     | 148244-82-0 | -14.646       | -77.5                      |
| Poliumoside                          | 94079-81-9  | -14.033       | -76.84                     |
| Cistanoside A                        | 93236-42-1  | -11.208       | -76.15                     |
| Pyrithoxin                           | 1098-97-1   | -10.339       | -75.4                      |
| Orientin                             | 28608-75-5  | -13.675       | -74.65                     |
| Oroxin B                             | 114482-86-9 | -15.768       | -73.61                     |
| Tubuloside A                         | 112516-05-9 | -15.34        | -72.33                     |
| Epimedin B                           | 110623-73-9 | -12.18        | -69.44                     |
| Vitexin -4"-O-glucoside              | 178468-00-3 | -14.501       | -68.86                     |
| Mulberroside A                       | 102841-42-9 | -12.418       | -68.26                     |
| (-)-Epigallocatechin Gallate         | 989-51-5    | -13.446       | -68.16                     |
| Emodin-8-glucoside                   | 23313-21-5  | -10.501       | -67.82                     |
| Mirificin                            | 103654-50-8 | -11.313       | -67.68                     |
| Baohuoside I                         | 113558-15-9 | -11.367       | -66.82                     |
| 2"-O-Galloylhyperin                  | 53209-27-1  | -14.565       | -66.5                      |
| 1,4-Dicaffeoylquinic acid            | 1182-34-9   | -10.823       | -66.17                     |
| Isochlorogenic acid B                | 14534-61-3  | -13.883       | -66                        |
| Rosavin                              | 84954-92-7  | -12.279       | -65.96                     |
| Vitexin                              | 3681-93-4   | -12.348       | -65.36                     |
| Riboflavin                           | 83-88-5     | -10.714       | -65.26                     |
| Silymarin                            | 65666-07-1  | -12.088       | -64.66                     |
| Proanthocyanidins                    | 4852-22-6   | -12.248       | -64.23                     |
| Pectolarin                           | 28978-02-1  | -13.794       | -63.13                     |
| Plantamajoside                       | 104777-68-6 | -13.115       | -62.34                     |
| D-Stachyose tetrahydrate             | 10094-58-3  | -16.923       | -61.98                     |
| polygalaxanthone III                 | 162857-78-5 | -10.018       | -61.8                      |
| Icaritin                             | 118525-40-9 | -10.034       | -61.54                     |
| Aurantio-obtusin                     | 67979-25-3  | -9.447        | -61.52                     |
| glucosylvitexin                      | 76135-82-5  | -14.307       | -61.4                      |
| Pueraria glycoside                   | 117060-54-5 | -10.015       | -61.2                      |
| (-)-Epicatechin gallate              | 1257-08-5   | -12.267       | -61.05                     |
| Dihydromyricetin                     | 27200-12-0  | -11.293       | -60.79                     |
| Diosmin                              | 520-27-4    | -12.913       | -60.75                     |
| Diosmetin-7-O-beta-D-glucopyranoside | 20126-59-4  | -10.631       | -60.36                     |
| Flavin Adenine Dinucleotide Disodium | 84366-81-4  | -13.307       | -59.82                     |
| Gefitinib                            | 184475-35-2 | -9.305        | -59.55                     |
| Dronedarone                          | 141626-36-0 | -9.978        | -59.53                     |
| Rhaponiticin                         | 155-58-8    | -10.046       | -59.04                     |
| Eriocitrin                           | 13463-28-0  | -11.624       | -58.85                     |
| Rutin                                | 153-18-4    | -12.265       | -58.79                     |
| Doxorubicin hydrochloride            | 25316-40-9  | -10.314       | -58.3                      |
| Amygdalin                            | 29883-15-6  | -10.414       | -57.98                     |
| Isorhamnetin 3-O-neohesperidin       | 55033-90-4  | -11.074       | -57.5                      |

| Name                                     | CAS          | docking score | MMGBSA dG Bind (kcal /mol) |
|------------------------------------------|--------------|---------------|----------------------------|
| Wogonoside                               | 51059-44-0   | -10.656       | -57.16                     |
| Icariin                                  | 489-32-7     | -10.245       | -57.14                     |
| Harpagoside                              | 19210-12-9   | -9.374        | -57.03                     |
| Hesperidin                               | 520-26-3     | -13.547       | -56.9                      |
| Trans-Zeatin Riboside                    | 6025-53-2    | -10.856       | -56.79                     |
| Paromomycin Sulfate                      | 1263-89-4    | -9.417        | -56.68                     |
| Piceid                                   | 65914-17-2   | -9.323        | -56.4                      |
| Quercitrin                               | 522-12-3     | -11.341       | -56.39                     |
| Naringin dihydrochalcone                 | 18916-17-1   | -10.897       | -56.29                     |
| 9''-MethylthiosperMate B                 | 1167424-32-9 | -13.276       | -56.16                     |
| Curculigoside                            | 85643-19-2   | -9.96         | -56.13                     |
| Neohesperidin                            | 13241-33-3   | -12.013       | -56.09                     |
| Rhoifolin                                | 17306-46-6   | -11.431       | -55.97                     |
| Naringin                                 | 10236-47-2   | -10.38        | -55.43                     |
| Rhodiosin                                | 86831-54-1   | -11.953       | -55.2                      |
| Tetrahydro Curcumin                      | 36062-04-1   | -9.545        | -55.09                     |
| Asperuloside                             | 14259-45-1   | -9.374        | -55.06                     |
| Narirutin                                | 14259-46-2   | -14.71        | -54.9                      |
| Oroxin A                                 | 57396-78-8   | -13.848       | -54.62                     |
| Plantagoside                             | 78708-33-5   | -14.235       | -54.44                     |
| tetrahydroxyl diphenylethylene-2-o-gluco | 55327-45-2   | -10.86        | -54.4                      |
| Methyl hesperidin                        | 11013-97-1   | -13.021       | -54.3                      |
| Genistin                                 | 529-59-9     | -10.454       | -53.79                     |
| Spinosin                                 | 72063-39-9   | -11.946       | -53.78                     |
| Isoorientin                              | 4261-42-1    | -10.622       | -53.41                     |
| Isochlorogenic acid C                    | 32451-88-0   | -12.226       | -52.99                     |
| Astragalus polyphenols                   | 82373-94-2   | -9.901        | -52.99                     |
| Adenosine                                | 58-61-7      | -9.974        | -52.55                     |
| Neodiosmin                               | 38665-01-9   | -11.179       | -52.53                     |
| Hyperoside                               | 482-36-0     | -12.923       | -52.4                      |
| 4,5-Dicaffeoylquinic acid                | 57378-72-0   | -12.312       | -51.82                     |
| kaempferide                              | 491-54-3     | -9.848        | -51.59                     |
| Verbascoside                             | 61276-17-3   | -13.556       | -51.43                     |
| Luteolin                                 | 491-70-3     | -9.943        | -51.13                     |
| Salvianolic Acid C                       | 115841-09-3  | -12.12        | -50.92                     |
| Orientin                                 | 28608-75-5   | -10.713       | -50.79                     |
| ISOQUERCITRIN                            | 21637-25-2   | -11.626       | -50.77                     |
| Manninotriose                            | 13382-86-0   | -11.863       | -50.6                      |
| Adenosine 5'-monophosphate               | 61-19-8      | -10.777       | -50.32                     |
| Thiocolchicoside                         | 602-41-5     | -9.769        | -50.09                     |
| Albiflorin                               | 39011-90-0   | -9.306        | -49.86                     |
| Vitexin-2''-O-rhamnoside                 | 64820-99-1   | -11.332       | -49.53                     |
| Picroside I                              | 27409-30-9   | -9.428        | -49.49                     |
| Neomangiferin                            | 64809-67-2   | -12.991       | -49.46                     |
| Anhydrocaritin                           | 38226-86-7   | -9.861        | -49.35                     |
| Forsythoside A                           | 79916-77-1   | -13.512       | -49.34                     |
| Tenuifoliside A                          | 139726-35-5  | -11.137       | -49.06                     |
| 2''-O-Galloylhyperin                     | 53209-27-1   | -10.549       | -49.06                     |
| Isochlorogenic acid A                    | 2450-53-5    | -9.872        | -48.81                     |

| Name                                     | CAS         | docking score | MMGBSA dG Bind (kcal /mol) |
|------------------------------------------|-------------|---------------|----------------------------|
| Esculin                                  | 531-75-9    | -9.483        | -48.47                     |
| Neochlorogenic acid                      | 906-33-2    | -9.289        | -48.34                     |
| Didymin                                  | 14259-47-3  | -12.634       | -48.25                     |
| N6-methyladenosine                       | 1867-73-8   | -10.49        | -48.18                     |
| Thymidine                                | 50-89-5     | -9.384        | -47.46                     |
| 8-O-Acetylharpagide                      | 6926-14-3   | -10.824       | -47.24                     |
| Quercetin Dihydrate                      | 6151-25-3   | -10.487       | -47.22                     |
| Diosmetin                                | 520-34-3    | -9.302        | -47.05                     |
| Phlorizin                                | 60-81-1     | -11.26        | -46.91                     |
| Troloxerutin                             | 7085-55-4   | -12.304       | -46.53                     |
| Luteolin-7-glucuronide                   | 29741-10-4  | -12.331       | -46.44                     |
| Agarotetrol                              | 69809-22-9  | -9.401        | -46.37                     |
| Casanthranol                             | 8024-48-4   | -9.634        | -46.09                     |
| Neohesperidin Dihydrochalcone            | 20702-77-6  | -9.899        | -45.81                     |
| Isorhamnetin                             | 480-19-3    | -9.598        | -45.59                     |
| Chlorogenic Acid                         | 327-97-9    | -10.189       | -45.47                     |
| Raffinose                                | 17629-30-0  | -12.924       | -45.18                     |
| Vitexin                                  | 3681-93-4   | -10           | -45.08                     |
| 3,6'-Disinapoyl sucrose                  | 139891-98-8 | -12.344       | -44.77                     |
| Kaempferitrin                            | 482-38-2    | -10.661       | -44.39                     |
| Echinacoside                             | 82854-37-3  | -13.331       | -43.96                     |
| Phlorizin dihydrate                      | 7061-54-3   | -11.106       | -43.72                     |
| (-)-3,5-Dicaffeoyl quinic acid           | 89919-62-0  | -9.739        | -43.64                     |
| Kaempferol                               | 520-18-3    | -9.772        | -43.36                     |
| Maltopentaose                            | 34620-76-3  | -14.443       | -43.3                      |
| Picoside II                              | 39012-20-9  | -9.593        | -42.91                     |
| Thymidine 5'-monophosphate disodium salt | 33430-62-5  | -9.502        | -42.08                     |
| Vaccarin                                 | 53452-16-7  | -10.192       | -42.06                     |
| 2'-Deoxyadenosine 5'-monophosphate       | 653-63-4    | -9.619        | -41.87                     |
| Neomangiferin                            | 64809-67-2  | -10.683       | -41.82                     |
| D-Cellobiose                             | 528-50-7    | -9.454        | -41.67                     |
| Morin                                    | 480-16-0    | -9.563        | -41.63                     |
| Picoside III                             | 64461-95-6  | -11.174       | -41.34                     |
| Baicalin                                 | 491-67-8    | -10.325       | -40.84                     |
| Arctiin                                  | 20362-31-6  | -9.973        | -40.83                     |
| Breviscapin                              | 116122-36-2 | -11.682       | -40.79                     |
| (-)-Epigallocatechin Gallate             | 989-51-5    | -9.661        | -40.76                     |
| Scutellarein                             | 529-53-3    | -9.646        | -39.86                     |
| Guanosine                                | 118-00-3    | -9.648        | -39.74                     |
| Tubercidin                               | 69-33-0     | -9.258        | -39.73                     |
| polygalaxanthone III                     | 162857-78-5 | -9.409        | -39.66                     |
| Forsythiin                               | 487-41-2    | -11           | -39.47                     |
| Nystose                                  | 13133-07-8  | -14.003       | -39.24                     |
| Sophoricoside                            | 152-95-4    | -9.267        | -38.95                     |
| Chicoric acid                            | 70831-56-0  | -9.775        | -38.09                     |
| D-Pantethine                             | 16816-67-4  | -9.687        | -36.86                     |
| 2"-O-Galloylhyperin                      | 53209-27-1  | -10.896       | -36.25                     |
| (-)-Gallocatechin gallate                | 4233-96-9   | -9.791        | -35.28                     |
| Uridine 5'-monophosphate                 | 58-97-9     | -9.738        | -35.13                     |

| Name                                           | CAS          | docking score | MMGBSA dG Bind (kcal /mol) |
|------------------------------------------------|--------------|---------------|----------------------------|
| (-)-Epicatechin gallate                        | 1257-08-5    | -9.343        | -35.01                     |
| Scutellarin                                    | 27740-01-8   | -11.413       | -34.24                     |
| Aloin                                          | 1415-73-2    | -11.083       | -33.82                     |
| 5'-Cytidylic acid                              | 63-37-6      | -9.318        | -33.75                     |
| 9'-Methyl lithospermate B                      | 1167424-31-8 | -9.456        | -33.49                     |
| Stevioside                                     | 57817-89-7   | -11.891       | -33                        |
| Plantagoside                                   | 78708-33-5   | -11.263       | -31.23                     |
| 2"-O-Galloylhyperin                            | 53209-27-1   | -10.183       | -31.07                     |
| Salvianolic acid B                             | 115939-25-8  | -12.545       | -29.55                     |
| Parishin B                                     | 174972-79-3  | -11.624       | -29.5                      |
| Calceolarioside B                              | 105471-98-5  | -11.6         | -28.83                     |
| Loganic acid                                   | 22255-40-9   | -9.559        | -27.23                     |
| Plantagoside                                   | 78708-33-5   | -9.324        | -26.76                     |
| Hyperoside                                     | 482-36-0     | -9.477        | -26.45                     |
| 5'-UMP disodium salt                           | 3387-36-8    | -9.607        | -26.43                     |
| Cyclic AMP                                     | 60-92-4      | -9.656        | -25.84                     |
| Secoxyloganin                                  | 58822-47-2   | -9.898        | -25.82                     |
| Naringin dihydrochalcone                       | 18916-17-1   | -10.009       | -23.86                     |
| polygalaxanthone III                           | 162857-78-5  | -10.56        | -23.14                     |
| Phlorizin                                      | 60-81-1      | -9.318        | -20.75                     |
| Adenosine 5'-monophosphate                     | 61-19-8      | -10.048       | -19.8                      |
| UDP disodium salt                              | 27821-45-0   | -9.701        | -19.58                     |
| Bilirubin                                      | 635-65-4     | -10.103       | -17.18                     |
| Thymidine 5'-monophosphate disodium salt       | 33430-62-5   | -9.868        | -16.35                     |
| Phlorizin dihydrate                            | 7061-54-3    | -10.703       | -15.88                     |
| Monotropein                                    | 5945-50-6    | -10.952       | -13.6                      |
| Neohesperidin Dihydrochalcone                  | 20702-77-6   | -10.611       | -12.36                     |
| Uridine 5'-monophosphate                       | 58-97-9      | -9.844        | -11.48                     |
| 2'-Deoxyuridine 5'-monophosphate disodium salt | 42155-08-8   | -9.706        | -11.14                     |
| UDP disodium salt                              | 27821-45-0   | -9.522        | 7.78                       |

## Decoy data set for virtual screening model validation

**Table S2.** The smiles structure of Positive compounds.

| Compd <sup>a</sup> | Smiles                                                                                                   |
|--------------------|----------------------------------------------------------------------------------------------------------|
| 1                  | <chem>O=C(N)C1=C(N)[N@]([C@]2=C(C)C=CC(O)=C2C)C3=C1C=C(C)C(C)=N3</chem>                                  |
| 2                  | <chem>O=C(C1=CN=C(NC2=CC(N3CCN(CCO)CC3)=NC(C)=N2)S1)NC4=C(C)C=CC=C4C1</chem>                             |
| 3                  | <chem>O=C(N1CC2[N](CC1)=NC=C2)C3=C(N)[N@]([C@]4=C(C)C=CC(O)=C4C)C5=C3C=C(C6CC6)C(C)=N5</chem>            |
| 4                  | <chem>CN(C1=C(C=C2C3=C(C1)C=CC=C3Cl)C=CC=C3Cl)C=NC(NC4=NC=C(OC5=NN(CC)C=C5)C=C4)=N1)C2=O</chem>          |
| 5                  | <chem>NC1=C(C(NC(C2=CN(C)N=C2)=C3)=O)C(C3=NC=N4)=C4[N@@]1[C@@]5=C(C)C=CC(O)=C5C</chem>                   |
| 6                  | <chem>CC(C=CC(O)=C1C)=[C@]1[C@@]2=C(C#N)C(C(C1)=C(C3=CN=C(N4[C@@H](C5)CO[C@@H]5C4)N=C3)N6)=C6N=C2</chem> |
| 7                  | <chem>O=C(N1CC2[N](CC1)=NC=C2)C3=C(N)[N@]([C@]4=C(C)C=CC(O)=C4C)C5=C3C=C(C)C(C)=N5</chem>                |
| 8                  | <chem>O=C(N1CC2[N](CC1)=NC=C2Cl)C3=C(N)[N@]([C@]4=C(C)C=CC(O)=C4C)C5=C3N=C(C)C(C)=N5</chem>              |
| 9                  | <chem>O=C(N1CC2[N](CC1)=NC=C2C#N)C3=C(N)[N@]([C@]4=C(C)C=CC(O)=C4C)C5=C3N=C(C)C(C)=N5</chem>             |
| 10                 | <chem>NC1=C(C(N)=O)C(C2=NC=CS2)=NN1C3=C(C)C=CC(O)=C3C</chem>                                             |
| 11                 | <chem>NC1=C(C(N)=O)C(C2=NC(C)=CS2)=NN1C3=C(C)C=CC(O)=C3C</chem>                                          |
| 12                 | <chem>NC1=C(C(N)=O)C(C2=NC(C(F)(F)F)=CS2)=NN1C3=C(C)C=CC(O)=C3C</chem>                                   |
| 13                 | <chem>O=C(N)C1=C(N)N(C2=C(C)C=CC(O)=C2C)C3=C1N=C(C=CC=C4Br)C4=N3</chem>                                  |
| 14                 | <chem>O=C(N)C1=C(N)N(C2=C(C)C=CC(O)=C2C)C3=C1N=C(C=CC=C4C#N)C4=N3</chem>                                 |
| 15                 | <chem>O=C(N)C1=C(N)N(C2=C(C)C=CC(O)=C2C)C3=C1N=C(C=C(Br)C=C4)C4=N3</chem>                                |
| 16                 | <chem>O=C(N)C1=C(N)N(C2=C(C)C=CC(O)=C2C)C3=C1N=C(C=C(C#N)C=C4)C4=N3</chem>                               |
| 17                 | <chem>O=C(N)C1=C(N)N(C2=C(C)C=CC(O)=C2C)C3=C1N=C(C=C(C4=CC=NN4C)C=C5)C5=N3</chem>                        |
| 18                 | <chem>COC(C=C1)=CN=C1NC2=NC3=C(C=C(C4=C(C)C(O)=CC=C4C)C(N3C)=O)C=N2</chem>                               |
| 19                 | <chem>O=C(NC(C1=CC=CC=C1)=N2)C3=C2C(C4=NC=CS4)=CC(C5=C(C=NN6)C6=CC=C5)=C3N</chem>                        |
| 20                 | <chem>O=C(NC=N1)C2=C1C(C3=NC=CS3)=CC(C4=C(C=NN5)C5=CC=C4C)=C2N</chem>                                    |
| 21                 | <chem>BrC1=CC(C2=C(C=NN3)C3=CC=C2)=C(N)C4=C1N=C(C5=CN=C(N6CCNCC6)C=C5)NC4=O</chem>                       |

<sup>a</sup>all of negative compounds were generate via these compounds by DUDE web.

## The dynamics simulations data of hit compounds and positive control.

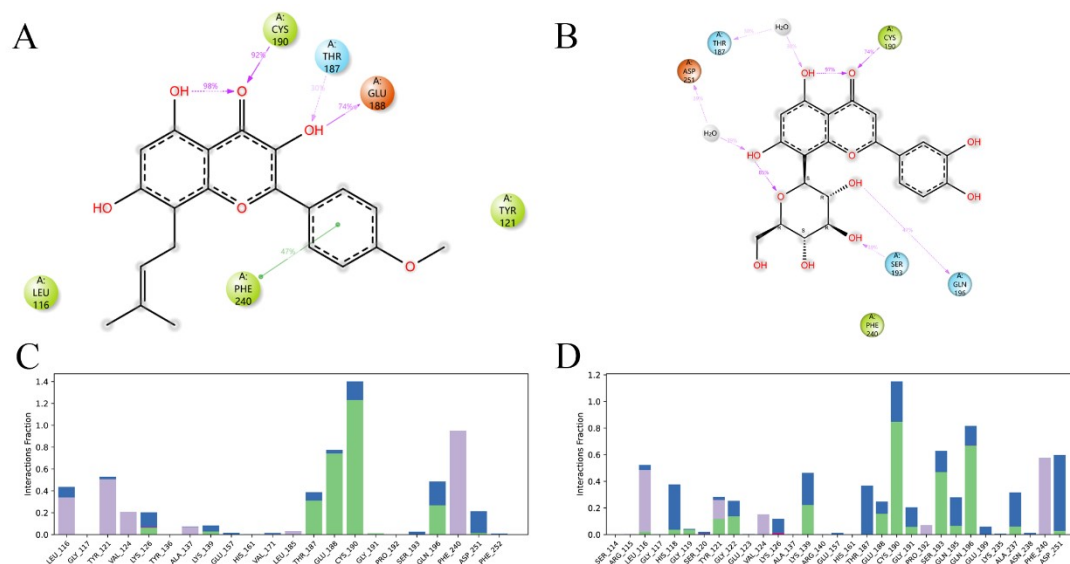

**Fig. S1** 2D interaction contacts diagram of (A) Icaritin and (B) Genistin, Histogram displaying of interaction fractions between protein and ligand through MD trajectory for (C) Icaritin and (D) Genistin.

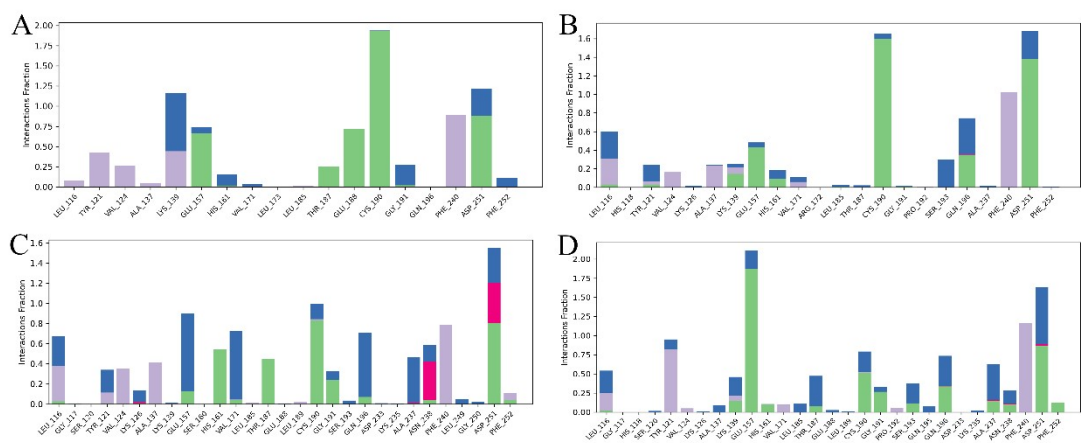

**Fig. S2** Histogram displaying of interaction fractions between protein and ligand through MD trajectory for (A) RP-6306, (B) Luteolin, (C) EGCG and (D) GCG.

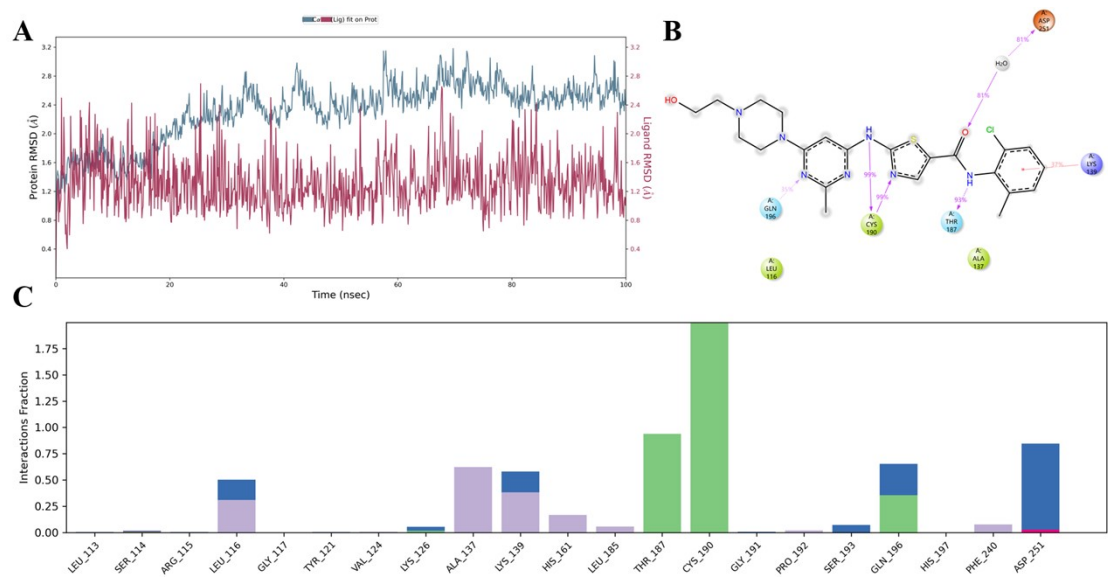

**Fig. S3** MD simulations analyses of **Dasatinib**. (A) RMSD plots of 5VCV. The above plot shows the RMSD evolution of a protein. Ligand RMSD (right Y-axis) indicates how stable the ligand is with respect to the protein and its binding pocket. (B) Protein-ligand contacts of 5VCV. (C) Histogram displaying of 5VCV.

## Raw data from compound kinase activity tests

**Table S3** Test concentration and inhibition rate of EGCG

| Concentration (nM) | 1 (Inhibition rate %) | 2 (Inhibition rate %) | 3 (Inhibition rate %) |
|--------------------|-----------------------|-----------------------|-----------------------|
| 10000              | 90.6081               | 88.4624               | 102.336               |
| 1000               | 97.0403               | 91.9284               | 101.882               |
| 200                | 83.6153               | 89.3351               | 73.9298               |
| 100                | 29.7895               | 20.6302               | 10.9172               |
| 20                 | 5.8468                | 5.6435                | 7.4633                |
| 8                  | 13.0232               | 8.7564                | -0.3341               |
| 1.6                | 8.5323                | 0.1557                | -0.0959               |



**Table S4** Test concentration and inhibition rate of GCG

| Concentration (nM) | 1 (Inhibition rate %) | 2 (Inhibition rate %) | 3 (Inhibition rate %) |
|--------------------|-----------------------|-----------------------|-----------------------|
| 10000              | 91.1944               | 93.3276               | 101.614               |
| 1000               | 95.1757               | 98.8724               | 101.196               |
| 200                | 71.5008               | 69.2304               | 75.4422               |
| 100                | 23.1747               | 19.2255               | 17.3848               |
| 20                 | 11.2653               | 9.4473                | 14.2025               |
| 8                  | 9.3872                | 10.599                | 7.0183                |
| 1.6                | 10.607                | 0.1088                | 7.2377                |

**Table S5** Test concentration and inhibition rate of Luteolin

| Concentration (nM) | 1 (Inhibition rate %) | 2 (Inhibition rate %) | 3 (Inhibition rate %) |
|--------------------|-----------------------|-----------------------|-----------------------|
| 10000              | 94.3423               | 98.0374               | 100.401               |
| 2000               | 70.9295               | 45.9267               | 85.1788               |
| 400                | 11.6908               | 2.4964                | 13.3276               |
| 80                 | 2.3864                | 10.1222               | 9.5818                |
| 16                 | 2.6408                | -10.2165              | 8.8092                |
| 1.6                | 6.4631                | 0.9268                | 6.1909                |

**Table S6** Test concentration and inhibition rate of RP-6306

| Concentration (nM) | 1 (Inhibition rate %) | 2 (Inhibition rate %) | 3 (Inhibition rate %) |
|--------------------|-----------------------|-----------------------|-----------------------|
| 1000               | 96.2896               | 97.6238               | 98.2138               |
| 200                | 97.9096               | 95.7139               | 97.775                |
| 40                 | 98.7672               | 99.1856               | 98.3973               |
| 8                  | 94.6417               | 94.597                | 93.2614               |
| 1.6                | 78.406                | 67.5346               | 60.8334               |
| 0.32               | 22.6529               | 15.8324               | 11.129                |
| 0.064              | 4.2735                | 1.4415                | 0.8177                |
| 0.0128             | 1.8042                | 1.2886                | 0.7713                |

**Table S7** Test concentration and inhibition rate of Genistin

| Concentration (nM) | 1 (Inhibition rate %) | 2 (Inhibition rate %) | 3 (Inhibition rate %) |
|--------------------|-----------------------|-----------------------|-----------------------|
| 100000             | 57.8404               | 61.0138               | 58.2416               |
| 50000              | 41.1270               | 44.5854               | 41.4200               |
| 10000              | 15.6763               | 21.7683               | 24.2202               |
| 2000               | 13.8721               | 22.7485               | 15.1127               |
| 400                | 10.4627               | 14.8606               | 10.8415               |
| 80                 | -1.1880               | 1.5044                | 13.2167               |

**Table S8** Test concentration and inhibition rate of Icaritin

| Concentration (nM) | 1 (Inhibition rate %) | 2 (Inhibition rate %) | 3 (Inhibition rate %) |
|--------------------|-----------------------|-----------------------|-----------------------|
| 100000             | 59.9511               | 65.0404               | 48.9980               |
| 50000              | 34.6897               | 48.6212               | 41.6845               |
| 10000              | 3.6226                | 19.5036               | 22.0069               |
| 2000               | 1.5641                | 0.1499                | 17.3470               |
| 400                | 17.5021               | 11.5058               | 13.5330               |
| 80                 | 14.6591               | 18.8085               | 18.9148               |
